# Supplementary material for: Association Between ECG Abnormalities and Fatal Cardiovascular Disease Among Patients With and Without Severe Mental Illness
Source: PubMed Central journal article supplement — J Am Heart Assoc. 2021 Jan 12;10(2):e019416. doi: 10.1161/JAHA.120.019416 (PMC7955293; doi:10.1161/jaha.120.019416), 2021-01-12

# **SUPPLEMENTAL MATERIAL**

**Table S1. Overview of criteria used to define ECG abnormalities.**

| <b>ECG Abnormalities</b>                           | <b>Criteria</b>                                                                                                                                                                                                                                                                                                                                                                |
|----------------------------------------------------|--------------------------------------------------------------------------------------------------------------------------------------------------------------------------------------------------------------------------------------------------------------------------------------------------------------------------------------------------------------------------------|
| LVH <sup>32</sup>                                  | Sokolow-Lyon criteria:<br>S wave in lead V1 and R wave in leads V5–V6 (largest) $\geq 35$ mm<br>Cornell voltage criteria:<br>S wave in lead V3 and R wave in lead aVL $> 28$ mm (male) or $> 20$ mm (female)<br>Requiring absence of:<br>RBBB, LBBB, and IVCD                                                                                                                  |
| Atrial fibrillation/flutter <sup>19</sup>          | Fibrillation or flutter waves with irregular or regular RR intervals, respectively                                                                                                                                                                                                                                                                                             |
| First-degree AV block <sup>19</sup>                | PR interval $> 200$ ms                                                                                                                                                                                                                                                                                                                                                         |
| RBBB <sup>19</sup>                                 | QRS duration $> 120$ ms<br>rSR' pattern in leads V1–V2<br>S-wave duration $> R$ -wave duration or $> 40$ ms in leads I and V6<br>Normal R peak in leads V5–V6 but $> 50$ ms in lead V1                                                                                                                                                                                         |
| Incomplete RBBB <sup>19</sup>                      | QRS duration $< 120$ ms<br>RBBB pattern                                                                                                                                                                                                                                                                                                                                        |
| LBBB <sup>19</sup>                                 | QRS duration $> 120$ ms<br>Absent Q waves in leads I and V5–V6<br>R-wave peak time $> 60$ ms in leads V5–V6<br>Notched R wave in leads I, aVL, and V5–V6                                                                                                                                                                                                                       |
| Incomplete LBBB <sup>19</sup>                      | QRS duration $< 120$ ms<br>LBBB pattern                                                                                                                                                                                                                                                                                                                                        |
| LAFB <sup>19</sup>                                 | QRS duration $< 120$ ms<br>Frontal plane axis between $-45$ and $-90$ degrees<br>qR pattern in lead aVL<br>R-wave peak time in lead aVL $> 45$ ms                                                                                                                                                                                                                              |
| LPFB <sup>19</sup>                                 | QRS duration $< 120$ ms<br>Frontal plane axis between $90$ and $180$ degrees<br>rS pattern in leads I and aVL<br>qR pattern in leads III and aVF                                                                                                                                                                                                                               |
| IVCD                                               | QRS duration $> 120$ ms<br>Requiring absence of:<br>RBBB and LBBB                                                                                                                                                                                                                                                                                                              |
| QTc prolongation <sup>33</sup>                     | Fridericia-corrected QT interval $> 450$ ms (male) or $> 470$ ms (female)                                                                                                                                                                                                                                                                                                      |
| Q waves <sup>34</sup>                              | Any Q wave in leads V2–V3 $> 20$ ms or QS complex in leads V2–V3<br>Q wave $\geq 30$ ms and $\geq 1$ mm or QS complex in leads I, II, aVL, aVF, or V4–V6 in any two leads of a contiguous lead grouping (I, aVL; V1–V6; II, III, aVF)<br>R wave $> 40$ ms in leads V1–V2 and R/S $> 1$ with a concordant positive T wave<br>Requiring absence of:<br>LVH, RBBB, LBBB, and IVCD |
| ST depression or inverted T waves <sup>34,35</sup> | New horizontal or downsloping ST depression $\geq 0.5$ mm in any two leads of a contiguous lead grouping (I, aVL; V1–V6; II, III, aVF)<br>T-wave inversion $> 1$ mm in any two leads of a contiguous lead grouping (I, aVL; V1–V6; II, III, aVF) with prominent R wave or R/S ratio $> 1$<br>Requiring absence of (in leads V1–V3):<br>RBBB, LBBB, and IVCD                    |
| ST elevation <sup>34,35,36</sup>                   | New ST elevation at the J point* in any two leads of a contiguous lead grouping (I, aVL; V1–V6; II, III, aVF) with the cut-off levels:                                                                                                                                                                                                                                         |

---

≥1 mm in all leads other than leads V2–V3, where the following cut-off levels apply:  
≥2 mm in male ≥40 years  
≥2.5 mm in male <40 years  
≥1.5 mm in female regardless of age  
Requiring absence of (in leads V1–V3):  
RBBB, LBBB, IVCD

---

\*Criteria for ST elevation were slightly modified as measurement of the ST segment was performed at QRS offset + 1/16 of the average RR interval, known as the STM point in the 12SL algorithm and equivalent to ~80 ms after QRS offset. STM was chosen instead of the J point as a notched or slurred appearance of the terminal QRS complex (i.e. early repolarization) can make it difficult to define the J point.

Abbreviations: AV, atrioventricular; ECG, electrocardiogram; IVCD, intraventricular conduction disturbance; LVH, left ventricular hypertrophy; QTc, corrected QT; RBBB, right bundle branch block; LAFB, left anterior fascicular block; LBBB, left bundle branch block; LPFB, left posterior fascicular block.

**Table S2. Overview of ICD-8, ICD-10, NCSP, and ATC codes used to identify medical comorbidities, procedures, and cardiovascular medications.**

| <b>Covariates</b>                                       | <b>ICD-8/-10 Codes</b>                                                                                                                             | <b>NCSP Codes</b> | <b>ATC Codes</b>           |
|---------------------------------------------------------|----------------------------------------------------------------------------------------------------------------------------------------------------|-------------------|----------------------------|
| Pacemaker/implantable cardioverter-defibrillator        | Z95.0                                                                                                                                              | BFCA–B            |                            |
| Heart failure                                           | 425, 427.0–.1; I11.0, I13.0, I13.2, I42, I50, J81                                                                                                  |                   |                            |
| Coronary artery disease including myocardial infarction | 410–414; I20–25                                                                                                                                    | KFNG0, KFNA–E     |                            |
| Atrial fibrillation/flutter                             | 427.93–.94; I48                                                                                                                                    | BFFB03–04         |                            |
| Valvular heart disease                                  | 394–396, 424.0–.1; I05–06, I34–35                                                                                                                  | KFK, KFM          |                            |
| Hypertension                                            | 400–404; I10–15                                                                                                                                    |                   | C02–03, C07–09             |
| Hyperlipidemia                                          | 279.00; E78.0–.5                                                                                                                                   |                   | C10                        |
| Diabetes                                                | 250; E10–14                                                                                                                                        |                   | A10                        |
| Chronic obstructive pulmonary disease                   | 490–492; J40–44                                                                                                                                    |                   | R03AC, R03AL, R03AK, R03BB |
| Chronic kidney disease                                  | 250.02, 400.39, 403–404, 581–584, 590.09, 593.20, 753.10–.11, 753.19; I12.0, N02–08, N11–14, N15.8–.9, N16, N18–19, N26, N39.1, M32.1B, Q61, Z99.2 | BJFD2             |                            |
| Diuretics                                               |                                                                                                                                                    |                   | C03A, C03C, C03EB          |
| ACEIs/ARBs                                              |                                                                                                                                                    |                   | C09A–D                     |
| Beta-blockers                                           |                                                                                                                                                    |                   | C07                        |

**Table S3. Overview of QT-prolonging medications. From <https://www.crediblemeds.org/>. Up to date as of September 01, 2020.**

| <b>Overall Classes</b>          | <b>Individual Medications</b>         | <b>ATC Codes</b> |
|---------------------------------|---------------------------------------|------------------|
| Alimentary tract and metabolism | Cisapride                             | A03FA02          |
|                                 | Domperidone                           | A03FA03          |
|                                 | Ondansetron                           | A04AA01          |
|                                 | Granisetron                           | A04AA02          |
|                                 | Tropisetron                           | A04AA03          |
|                                 | Dolasetron                            | A04AA04          |
|                                 | Palonosetron                          | A04AA05          |
|                                 | Eliglustat                            | A16AX10          |
| Blood and blood-forming organs  | Cilostazol                            | B01AC23          |
|                                 |                                       |                  |
| Cardiovascular system           | Quinidine                             | C01BA01          |
|                                 | Procainamide                          | C01BA02          |
|                                 | Disopyramide                          | C01BA03          |
|                                 | Hydroquinidine                        | C01BA13          |
|                                 | Flecainide                            | C01BC04          |
|                                 | Amiodarone                            | C01BD01          |
|                                 | Dofetilide                            | C01BD04          |
|                                 | Ibutilide                             | C01BD05          |
|                                 | Dronedarone                           | C01BD07          |
|                                 | Ketanserin                            | C02KD01          |
|                                 | Sotalol                               | C07AA07          |
|                                 | Isradipine                            | C08CA03          |
|                                 | Nicardipine                           | C08CA04          |
|                                 | Lacidipine                            | C08CA09          |
|                                 | Bepidil                               | C08EA02          |
|                                 | Moexipril                             | C09AA13          |
|                                 | Probucol                              | C10AX02          |
|                                 | Genitourinary system and sex hormones | Mifepristone     |
| Terodiline                      |                                       | G04BD05          |
| Tolterodine                     |                                       | G04BD07          |
| Mirabegron                      |                                       | G04BD12          |
| Vardenafil                      |                                       | G04BE09          |
| Alfuzosin                       |                                       | G04CA01          |
| Systemic hormonal preparations  | Terlipressin                          | H01BA04          |
|                                 | Oxytocin                              | H01BB02          |
|                                 | Carbetocin                            | H01BB03          |
|                                 | Pasireotide                           | H01CB05          |
|                                 | Osilodrostat                          | H02CA02          |
| Antiinfectives                  | Erythromycin                          | J01FA01          |

|                                            |                         |         |
|--------------------------------------------|-------------------------|---------|
|                                            | Roxithromycin           | J01FA06 |
|                                            | Clarithromycin          | J01FA09 |
|                                            | Azithromycin            | J01FA10 |
|                                            | Telithromycin           | J01FA15 |
|                                            | Ofloxacin               | J01MA01 |
|                                            | Ciprofloxacin           | J01MA02 |
|                                            | Norfloxacin             | J01MA06 |
|                                            | Sparfloxacin            | J01MA09 |
|                                            | Grepafloxacin           | J01MA11 |
|                                            | Levofloxacin            | J01MA12 |
|                                            | Moxifloxacin            | J01MA14 |
|                                            | Gemifloxacin            | J01MA15 |
|                                            | Gatifloxacin            | J01MA16 |
|                                            | Telavancin              | J01XA03 |
|                                            | Lefamulin               | J01XX12 |
|                                            | Fluconazole             | J02AC01 |
|                                            | Bedaquiline             | J04AK05 |
|                                            | Delamanid               | J04AK06 |
|                                            | Clofazimine             | J04BA01 |
|                                            | Saquinavir              | J05AE01 |
|                                            | Efavirenz               | J05AG03 |
|                                            | Rilpivirine             | J05AG05 |
|                                            | Lopinavir and ritonavir | J05AR10 |
|                                            | Fluorouracil            | L01BC02 |
|                                            | Capecitabine            | L01BC06 |
|                                            | Epirubicin              | L01DB03 |
|                                            | Aclarubicin             | L01DB04 |
|                                            | Oxaliplatin             | L01XA03 |
|                                            | Necitumumab             | L01XC22 |
|                                            | Inotuzumab ozogamicin   | L01XC26 |
|                                            | Sunitinib               | L01XE04 |
|                                            | Sorafenib               | L01XE05 |
|                                            | Dasatinib               | L01XE06 |
|                                            | Lapatinib               | L01XE07 |
| Antineoplastic and immunomodulating agents | Nilotinib               | L01XE08 |
|                                            | Pazopanib               | L01XE11 |
|                                            | Vandetanib              | L01XE12 |
|                                            | Bosutinib               | L01XE14 |
|                                            | Vemurafenib             | L01XE15 |
|                                            | Crizotinib              | L01XE16 |
|                                            | Dabrafenib              | L01XE23 |
|                                            | Cabozantinib            | L01XE26 |
|                                            | Ceritinib               | L01XE28 |
|                                            | Lenvatinib              | L01XE29 |
|                                            | Osimertinib             | L01XE35 |
|                                            | Cobimetinib             | L01XE38 |

|                        |                  |         |
|------------------------|------------------|---------|
|                        | Midostaurin      | L01XE39 |
|                        | Ribociclib       | L01XE42 |
|                        | Encorafenib      | L01XE46 |
|                        | Entrectinib      | L01XE56 |
|                        | Arsenic trioxide | L01XX27 |
|                        | Bortezomib       | L01XX32 |
|                        | Anagrelide       | L01XX35 |
|                        | Vorinostat       | L01XX38 |
|                        | Romidepsin       | L01XX39 |
|                        | Eribulin         | L01XX41 |
|                        | Panobinostat     | L01XX42 |
|                        | Rucaparib        | L01XX55 |
|                        | Bendamustine     | L01AA09 |
|                        | Leuprorelin      | L02AE02 |
|                        | Tamoxifen        | L02BA01 |
|                        | Toremifene       | L02BA02 |
|                        | Apalutamide      | L02BB05 |
|                        | Abarelix         | L02BX01 |
|                        | Degarelix        | L02BX02 |
|                        | Tacrolimus       | L04AD02 |
|                        | Fingolimod       | L04AA27 |
|                        | Siponimod        | L04AA42 |
| Musculoskeletal system | Tizanidine       | M03BX02 |
|                        | Nusinersen       | M09AX07 |
|                        | Sevoflurane      | N01AB08 |
|                        | Propofol         | N01AX10 |
|                        | Cocaine          | N01BC01 |
|                        | Buprenorphine    | N02AE01 |
|                        | Tramadol         | N02AX02 |
|                        | Felbamate        | N03AX10 |
|                        | Retigabine       | N03AX21 |
|                        | Apomorphine      | N04BC07 |
|                        | Perphenazine     | N05AB03 |
|                        | Thioridazine     | N05AC02 |
|                        | Mesoridazine     | N05AC03 |
| Nervous system         | Haloperidol      | N05AD01 |
|                        | Melperone        | N05AD03 |
|                        | Pipamperone      | N05AD05 |
|                        | Benperidol       | N05AD07 |
|                        | Droperidol       | N05AD08 |
|                        | Sertindole       | N05AE03 |
|                        | Lurasidone       | N05AE05 |
|                        | Flupentixol      | N05AF01 |
|                        | Chlorprothixene  | N05AF03 |
|                        | Zuclopenthixol   | N05AF05 |
|                        | Pimozide         | N05AG02 |

|                                              |                           |         |
|----------------------------------------------|---------------------------|---------|
|                                              | Clozapine                 | N05AH02 |
|                                              | Asenapine                 | N05AH05 |
|                                              | Clotiapine                | N05AH06 |
|                                              | Sulpiride                 | N05AL01 |
|                                              | Sultopride                | N05AL02 |
|                                              | Tiapride                  | N05AL03 |
|                                              | Levosulpiride             | N05AL07 |
|                                              | Lithium                   | N05AN01 |
|                                              | Prothipendyl              | N05AX07 |
|                                              | Zotepine                  | N05AX11 |
|                                              | Aripiprazole              | N05AX12 |
|                                              | Paliperidone              | N05AX13 |
|                                              | Iloperidone               | N05AX14 |
|                                              | Pimavanserin              | N05AX17 |
|                                              | Dexmedetomidine           | N05CM18 |
|                                              | Chlorpromazine            | N05AA01 |
|                                              | Levomepromazine           | N05AA02 |
|                                              | Cyamemazine               | N05AA06 |
|                                              | Citalopram                | N06AB04 |
|                                              | Escitalopram              | N06AB10 |
|                                              | Mianserin                 | N06AX03 |
|                                              | Mirtazapine               | N06AX11 |
|                                              | Venlafaxine               | N06AX16 |
|                                              | Atomoxetine               | N06BA09 |
|                                              | Donepezil                 | N06DA02 |
|                                              | Memantine                 | N06DX01 |
|                                              | Desipramine               | N06AA01 |
|                                              | Imipramine                | N06AA02 |
|                                              | Trimipramine              | N06AA06 |
|                                              | Nortriptyline             | N06AA10 |
|                                              | Maprotiline               | N06AA21 |
|                                              | Methadone                 | N07BC02 |
|                                              | Levacetylmethadol         | N07BC03 |
|                                              | Lofexidine                | N07BC04 |
|                                              | Levomethadone             | N07BC05 |
|                                              | Tetrabenazine             | N07XX06 |
|                                              | Pitolisant                | N07XX11 |
|                                              | Valbenazine               | N07XX13 |
|                                              | Dextromethorphan          | N07XX59 |
|                                              | Chloroquine               | P01BA01 |
|                                              | Hydroxychloroquine        | P01BA02 |
|                                              | Primaquine phosphate      | P01BA03 |
|                                              | Arthemether               | P01BF01 |
|                                              | Artemimol and piperaquine | P01BF05 |
|                                              | Halofantrine              | P01BX01 |
|                                              | Pentamidine               | P01CX01 |
| Antiparasitics, insecticides, and repellents |                           |         |



---

|                    |              |         |
|--------------------|--------------|---------|
| Respiratory system | Hydrocodone  | R05DA03 |
|                    | Alimemazine  | R06AD01 |
|                    | Promethazine | R06AD02 |
|                    | Astemizole   | R06AX11 |
|                    | Terfenadine  | R06AX12 |

---

**Table S4. Patient characteristics stratified by subtype of SMI diagnosis.**

|                                       | <b>Controls<br/>(n=336 524)</b> | <b>Schizophrenia<br/>(n=4477)</b> | <b>Bipolar disorder<br/>(n=2571)</b> | <b>Severe<br/>depression<br/>(n=2980)</b> | <b><i>P</i></b> |
|---------------------------------------|---------------------------------|-----------------------------------|--------------------------------------|-------------------------------------------|-----------------|
| Age at ECG recording, years           | 56 [41–69]                      | 50 [39–61]                        | 58 [44–70]                           | 58 [45–72]                                | <0.001          |
| Males                                 | 161 282 (47.9)                  | 2443 (54.6)                       | 987 (38.4)                           | 1034 (34.7)                               | <0.001          |
| SMI duration, years                   | NA                              | 10 [5–16]                         | 7 [3–12]                             | 5 [2–9]                                   | NA              |
| Heart failure                         | 10 433 (3.1)                    | 158 (3.5)                         | 117 (4.6)                            | 146 (4.9)                                 | <0.001          |
| Coronary artery disease               | 29 232 (8.7)                    | 304 (6.8)                         | 250 (9.7)                            | 334 (11.2)                                | <0.001          |
| Atrial fibrillation/flutter           | 14 903 (4.4)                    | 120 (2.7)                         | 135 (5.3)                            | 169 (5.7)                                 | <0.001          |
| Valvular heart disease                | 3690 (1.1)                      | 36 (0.8)                          | 36 (1.4)                             | 51 (1.7)                                  | 0.001           |
| Hypertension                          | 50 432 (15.0)                   | 490 (10.9)                        | 420 (16.3)                           | 569 (19.1)                                | <0.001          |
| Hyperlipidemia                        | 49 201 (14.6)                   | 689 (15.4)                        | 462 (18.0)                           | 535 (18.0)                                | <0.001          |
| Diabetes                              | 26 732 (7.9)                    | 644 (14.4)                        | 288 (11.2)                           | 290 (9.7)                                 | <0.001          |
| Chronic obstructive pulmonary disease | 29 093 (8.6)                    | 655 (14.6)                        | 337 (13.1)                           | 359 (12.0)                                | <0.001          |
| Chronic kidney disease                | 6328 (1.9)                      | 108 (2.4)                         | 119 (4.6)                            | 84 (2.8)                                  | <0.001          |
| ACEIs/ARBs                            | 64 743 (19.2)                   | 515 (11.5)                        | 378 (14.7)                           | 508 (17.0)                                | <0.001          |
| Beta-blockers                         | 32 384 (9.6)                    | 290 (6.5)                         | 200 (7.8)                            | 275 (9.2)                                 | <0.001          |
| Diuretics                             | 45 533 (13.5)                   | 565 (12.6)                        | 430 (16.7)                           | 472 (15.8)                                | <0.001          |
| QT-prolonging medications             | 44 377 (13.2)                   | 2885 (64.4)                       | 1878 (73.0)                          | 2056 (69.0)                               | <0.001          |

**Table S5. ECG characteristics stratified by subtype of SMI diagnosis.**

|                                            | <b>Controls<br/>(n=336 524)</b> | <b>Schizophrenia<br/>(n=4477)</b> | <b>Bipolar disorder<br/>(n=2571)</b> | <b>Severe<br/>depression<br/>(n=2980)</b> | <b>P</b> |
|--------------------------------------------|---------------------------------|-----------------------------------|--------------------------------------|-------------------------------------------|----------|
| Heart rate, bpm                            | 69 [61–78]                      | 78 [68–89]                        | 72 [64–82]                           | 75 [66–85]                                | <0.001   |
| Missing                                    | 30 361                          | 219                               | 228                                  | 239                                       |          |
| P-wave duration, ms                        | 108 [100–116]                   | 106 [98–114]                      | 110 [102–118]                        | 108 [100–116]                             | <0.001   |
| Missing                                    | 30 361                          | 219                               | 228                                  | 239                                       |          |
| PR interval, ms                            | 156 [144–174]                   | 154 [140–168]                     | 162 [146–178]                        | 156 [142–172]                             | 0.782    |
| Missing                                    | 30 361                          | 219                               | 228                                  | 239                                       |          |
| QRS duration, ms                           | 92 [84–100]                     | 90 [84–98]                        | 92 [84–100]                          | 90 [84–98]                                | <0.001   |
| Missing                                    | 30 361                          | 219                               | 228                                  | 239                                       |          |
| QT interval, ms                            | 396 [376–416]                   | 384 [362–404]                     | 394 [374–416]                        | 390 [370–410]                             | <0.001   |
| Missing                                    | 30 361                          | 219                               | 228                                  | 239                                       |          |
| QTcF interval, ms                          | 414 [402–427]                   | 416 [402–430]                     | 418 [404–431]                        | 417 [405–431]                             | <0.001   |
| Missing                                    | 30 361                          | 219                               | 228                                  | 239                                       |          |
| No ECG abnormality                         | 237 397 (70.5)                  | 3380 (75.5)                       | 1789 (69.6)                          | 2126 (71.3)                               | <0.001   |
| Minor ECG abnormality                      | 18 541 (5.5)                    | 292 (6.5)                         | 189 (7.4)                            | 179 (6.0)                                 | <0.001   |
| First-degree<br>atrioventricular block     | 13 477 (4.0)                    | 107 (2.4)                         | 144 (5.6)                            | 133 (4.5)                                 | <0.001   |
| Incomplete bundle branch<br>block          | 8504 (2.5)                      | 97 (2.2)                          | 58 (2.3)                             | 55 (1.8)                                  | 0.036    |
| Incomplete right bundle<br>branch block    | 7680 (2.3)                      | 92 (2.1)                          | 49 (1.9)                             | 51 (1.7)                                  | 0.076    |
| Incomplete left bundle<br>branch block     | 824 (0.2)                       | 5 (0.1)                           | 9 (0.4)                              | 4 (0.1)                                   | 0.116    |
| Left fascicular block                      | 4504 (1.3)                      | 85 (1.9)                          | 42 (1.6)                             | 50 (1.7)                                  | 0.002    |
| Left anterior fascicular<br>block          | 2743 (0.8)                      | 40 (0.9)                          | 30 (1.2)                             | 32 (1.1)                                  | 0.088    |
| Left posterior fascicular<br>block         | 1761 (0.5)                      | 45 (1.0)                          | 12 (0.5)                             | 18 (0.6)                                  | <0.001   |
| QTcF prolongation                          | 5831 (1.7)                      | 159 (3.6)                         | 90 (3.5)                             | 75 (2.5)                                  | <0.001   |
| Major ECG abnormality                      | 80 586 (23.9)                   | 805 (18.0)                        | 593 (23.1)                           | 675 (22.7)                                | <0.001   |
| Left ventricular<br>hypertrophy            | 35 832 (10.6)                   | 322 (7.2)                         | 242 (9.4)                            | 286 (9.6)                                 | <0.001   |
| Atrial fibrillation/flutter                | 12 561 (3.7)                    | 52 (1.2)                          | 84 (3.3)                             | 98 (3.3)                                  | <0.001   |
| Bundle branch block                        | 11 550 (3.4)                    | 104 (2.3)                         | 97 (3.8)                             | 101 (3.4)                                 | <0.001   |
| Right bundle branch block                  | 7803 (2.3)                      | 77 (1.7)                          | 69 (2.7)                             | 71 (2.4)                                  | 0.035    |
| Left bundle branch block                   | 3747 (1.1)                      | 27 (0.6)                          | 28 (1.1)                             | 30 (1.0)                                  | 0.013    |
| Intraventricular conduction<br>disturbance | 2786 (0.8)                      | 29 (0.6)                          | 23 (0.9)                             | 24 (0.8)                                  | 0.590    |
| Q waves                                    | 17 064 (5.1)                    | 244 (5.5)                         | 127 (4.9)                            | 170 (5.7)                                 | 0.278    |
| ST-T deviations                            | 15 283 (4.5)                    | 149 (3.3)                         | 114 (4.4)                            | 118 (4.0)                                 | <0.001   |

**Table S6. Brier scores.**

| <b>Population</b>         | <b>Brier Score (95% CI) For Conventional Model</b> | <b>Brier Score (95% CI) For ECG Abnormality Model</b> |
|---------------------------|----------------------------------------------------|-------------------------------------------------------|
| Controls                  |                                                    |                                                       |
| Cardiovascular disease    | 0.186 (0.182–0.190)                                | 0.182 (0.178–0.187)                                   |
| No cardiovascular disease | 0.053 (0.052–0.054)                                | 0.052 (0.051–0.053)                                   |
| SMI                       |                                                    |                                                       |
| Cardiovascular disease    | 0.223 (0.198–0.251)                                | 0.222 (0.194–0.253)                                   |
| No cardiovascular disease | 0.082 (0.072–0.093)                                | 0.081 (0.071–0.092)                                   |

**Figure S1. Flowchart.**

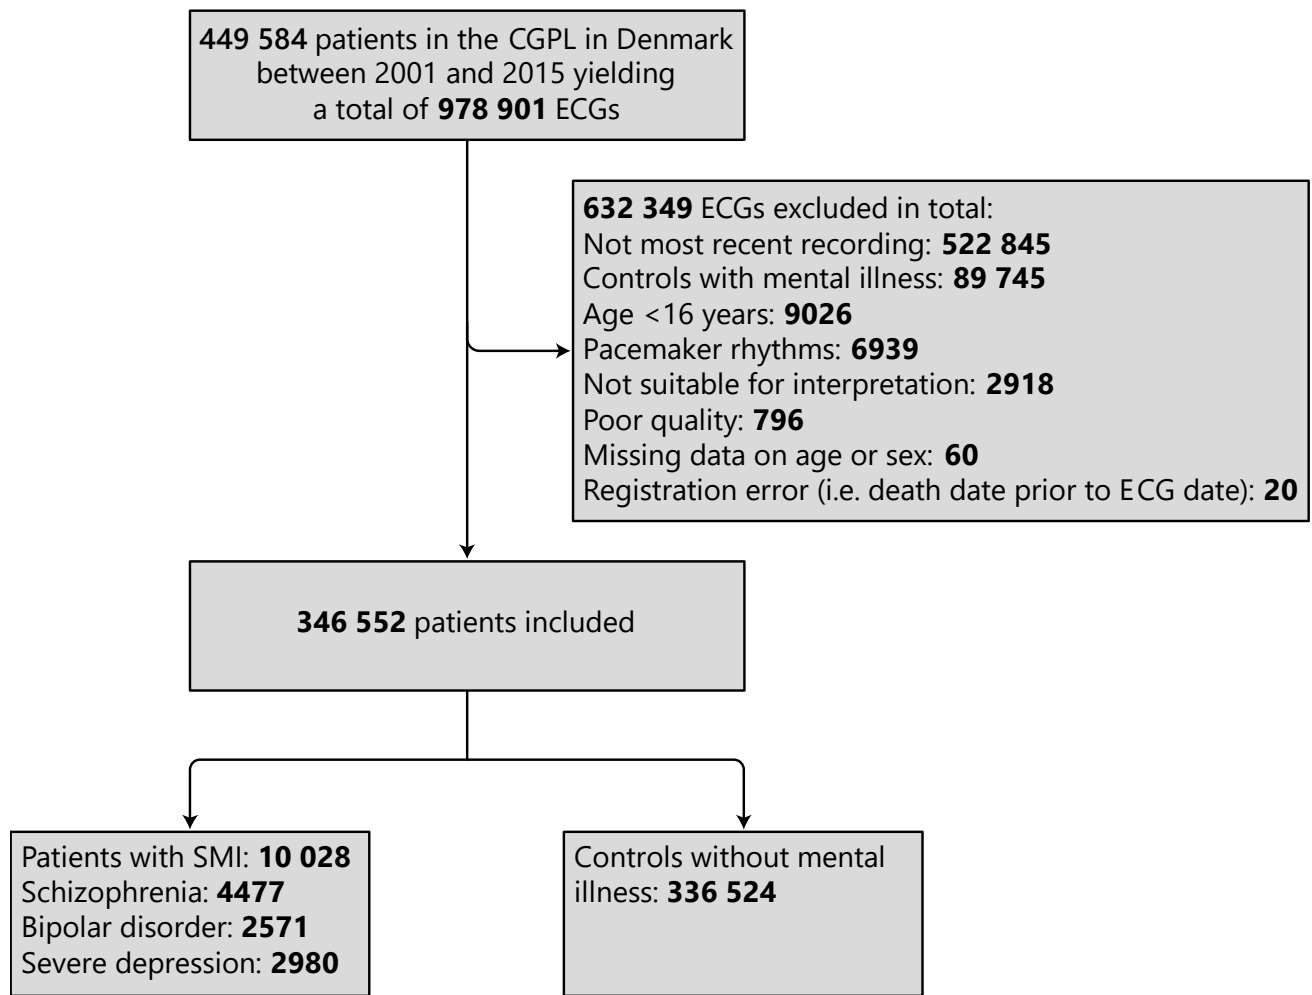

**Figure S2. Association between SMI status and ECG abnormalities combined and long-term outcomes.**

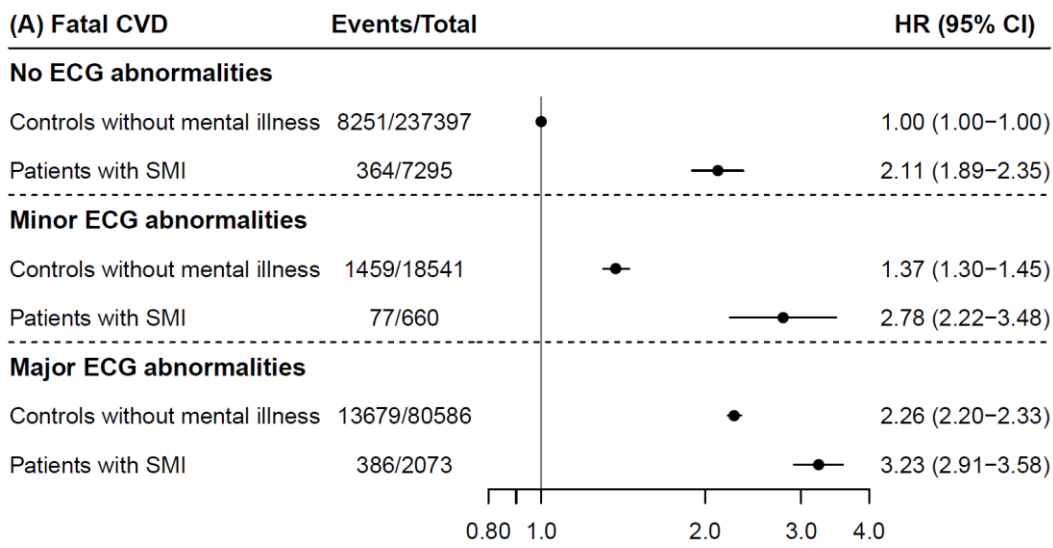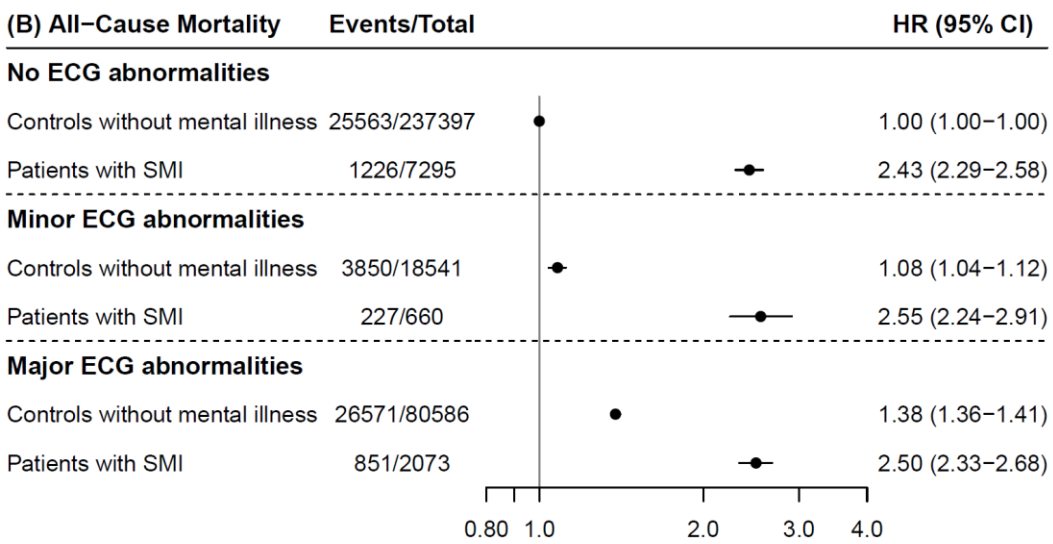

**Figure S3. ECG abnormalities and fatal CVD risk stratified by subtype of SMI diagnosis.**

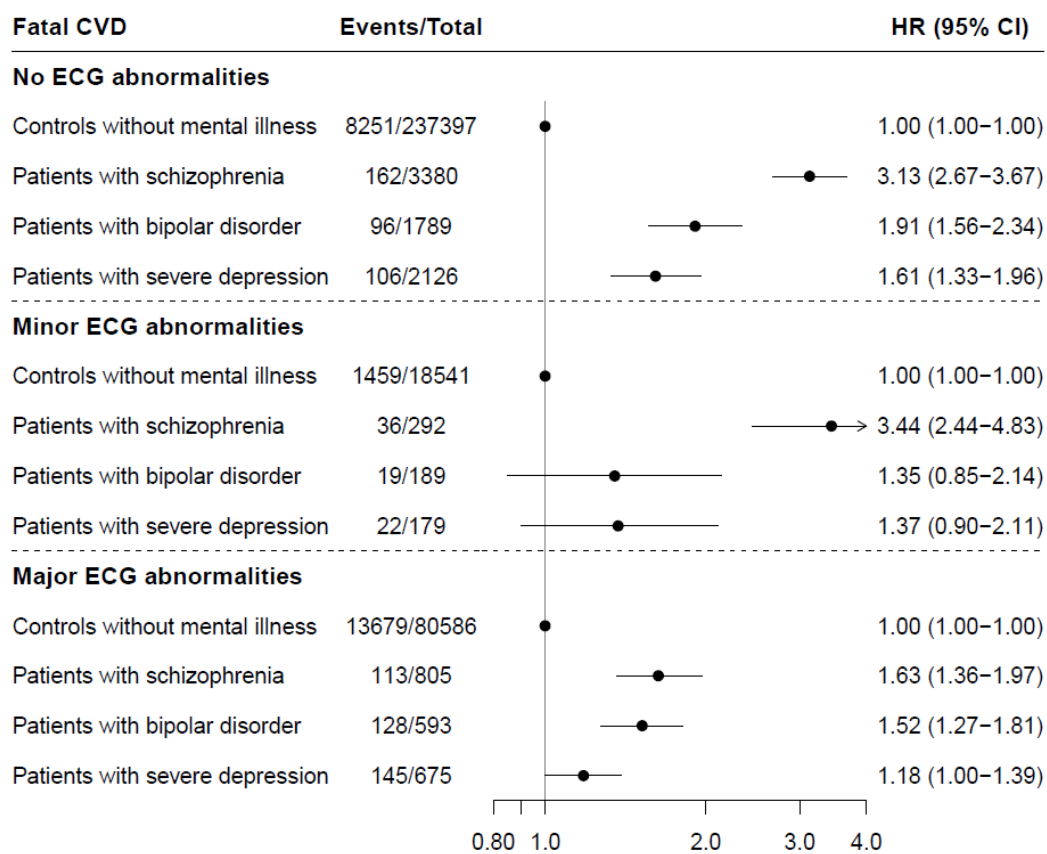

**Figure S4. AUC values.**

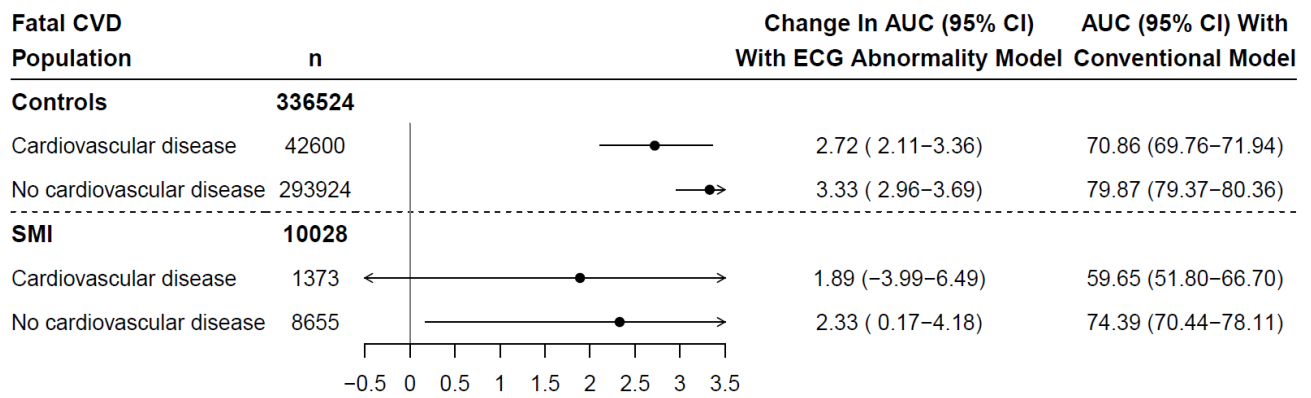

Supplement: JAH3-10-e019416-s001.pdf [file JAH3-10-e019416-s001.pdf]
